# Supplementary material for: The Readability of Electronic Cigarette Health Information and Advice: A Quantitative Analysis of Web-Based Information
Source: PubMed Central journal article supplement (PMC5251168; doi:10.2196/publichealth.6687), 2017-01-06
Supplement: publichealth_v3i1e1_app1.pdf [file publichealth_v3i1e1_app1.pdf]

## Multimedia Appendix 1 - Individual scores

| Organization                                                              | Country   | Organization Type           | Flesch Kincaid Grade | SMOG Index | Coleman Liau Index | Automated Readability Index | Average | Original URL                                                                                                                                                                    | Archived URL                                                                            | Note                                                                  |
|---------------------------------------------------------------------------|-----------|-----------------------------|----------------------|------------|--------------------|-----------------------------|---------|---------------------------------------------------------------------------------------------------------------------------------------------------------------------------------|-----------------------------------------------------------------------------------------|-----------------------------------------------------------------------|
| Alaska Department of Health and Social Services Division of Public Health | USA       | US government entities      | 10.9                 | 9.6        | 15.5               | 13.7                        | 12.4    | <a href="http://dhss.alaska.gov/dph/Chronic/Pages/Tobacco/TobaccoFreeAlaska/ecigs.aspx">http://dhss.alaska.gov/dph/Chronic/Pages/Tobacco/TobaccoFreeAlaska/ecigs.aspx</a>       | <a href="http://www.webcitation.org/6f1nCLI7R">http://www.webcitation.org/6f1nCLI7R</a> |                                                                       |
| American Lung Association                                                 | USA       | Nongovernment organizations | 12.7                 | 11.4       | 16.0               | 14.8                        | 13.7    | <a href="http://www.lung.org/stop-smoking/smoking-facts/e-cigarettes-and-lung-health.html">http://www.lung.org/stop-smoking/smoking-facts/e-cigarettes-and-lung-health.html</a> | N/A – we were not able to archive the URL                                               |                                                                       |
| Australian Government Department of Health                                | Australia | Non-US government entities  | 15.2                 | 13.3       | 16.8               | 17.0                        | 15.6    | <a href="https://www.tga.gov.au/community-qa/electronic-cigarettes">https://www.tga.gov.au/community-qa/electronic-cigarettes</a>                                               | <a href="http://www.webcitation.org/6f2CsWou9">http://www.webcitation.org/6f2CsWou9</a> |                                                                       |
| Board of Equalization - State of California                               | USA       | US government entities      | 13.9                 | 11.7       | 16.2               | 15.1                        | 14.2    | <a href="http://www.boe.ca.gov/ma/pdf/e-CigReport.pdf">http://www.boe.ca.gov/ma/pdf/e-CigReport.pdf</a>                                                                         | <a href="http://www.webcitation.org/6f1fhdMWk">http://www.webcitation.org/6f1fhdMWk</a> | We examined “E-Cigarettes and Health Effects of E-cigarettes” section |
| Boulder County                                                            | USA       | US government entities      | 12.0                 | 11.1       | 15.3               | 13.4                        | 13.0    | <a href="http://www.bouldercounty.org/env/healthyhome/pages/e-cigarettes.aspx">http://www.bouldercounty.org/env/healthyhome/pages/e-cigarettes.aspx</a>                         | N/A – we were not able to archive the URL                                               |                                                                       |
| Colorado Department of Public Health and Environment                      | USA       | US government entities      | 10.7                 | 11.3       | 14.8               | 12.9                        | 12.4    | <a href="https://www.colorado.gov/pacific/sites/default/files/HPF_WIC_e-Cigarette-">https://www.colorado.gov/pacific/sites/default/files/HPF_WIC_e-Cigarette-</a>               | <a href="http://www.webcitation.org/6f1gTNIXS">http://www.webcitation.org/6f1gTNIXS</a> |                                                                       |

|                                     |         |                                |      |      |      |      |      |                                                                                                                                                                                                                                 |                                                                                         |                                                                                                                  |  |
|-------------------------------------|---------|--------------------------------|------|------|------|------|------|---------------------------------------------------------------------------------------------------------------------------------------------------------------------------------------------------------------------------------|-----------------------------------------------------------------------------------------|------------------------------------------------------------------------------------------------------------------|--|
| nt                                  |         |                                |      |      |      |      |      |                                                                                                                                                                                                                                 | Fact-Sheet.pdf                                                                          |                                                                                                                  |  |
| Consumer<br>Affair                  | USA     | For-profit<br>entities         | 11.2 | 10.2 | 13.9 | 11.5 | 11.7 | <a href="http://www.consumeraffairs.com/e-cigarettes/#guide-features">http://www.consumeraffairs.com/e-cigarettes/#guide-features</a>                                                                                           | <a href="http://www.webcitation.org/6f2AmUkHm">http://www.webcitation.org/6f2AmUkHm</a> | We excluded<br>"Expert reviews"<br>section and<br>material consists<br>of advice on<br>using e-cigarette<br>only |  |
| Consumer<br>Reports                 | USA     | Nongovernment<br>organizations | 11.4 | 9.9  | 14.0 | 14.4 | 12.4 | <a href="http://www.consumerreports.org/cro/health/e-cigarette-guide/index.htm">http://www.consumerreports.org/cro/health/e-cigarette-guide/index.htm</a>                                                                       | <a href="http://www.webcitation.org/6f1rp3gr4">http://www.webcitation.org/6f1rp3gr4</a> |                                                                                                                  |  |
| E Cigarettes<br>Store               | N/A     | For-profit<br>entities         | 10.1 | 8.9  | 9.4  | 10.6 | 9.8  | <a href="http://www.ecigarettesstore.info/category/advice/">http://www.ecigarettesstore.info/category/advice/</a>                                                                                                               | <a href="http://www.webcitation.org/6f2Jce2Dt">http://www.webcitation.org/6f2Jce2Dt</a> |                                                                                                                  |  |
| Electronic<br>Cigarettes            | England | For-profit<br>entities         | 10.8 | 10.2 | 12.5 | 11.2 | 11.2 | <a href="http://www.electroniccigarette.co.uk/electronic-cigarettes/smoking-cessation-with-electronic-cigarettes/">http://www.electroniccigarette.co.uk/electronic-cigarettes/smoking-cessation-with-electronic-cigarettes/</a> | <a href="http://www.webcitation.org/6f2EHn4O6">http://www.webcitation.org/6f2EHn4O6</a> |                                                                                                                  |  |
| Electronic<br>Cigarettes<br>Reviews | N/A     | For-profit<br>entities         | 9.6  | 9.3  | 10.7 | 10.9 | 10.1 | <a href="https://www.electroniccigarettesreviews.net/buying-online">https://www.electroniccigarettesreviews.net/buying-online</a>                                                                                               | <a href="http://www.webcitation.org/6f2ltroUR">http://www.webcitation.org/6f2ltroUR</a> | Material consists<br>of advice on<br>using e-cigarette<br>only                                                   |  |
| electroniccigaretteadvice           | USA     | For-profit<br>entities         | 7.3  | 7.5  | 7.6  | 7.2  | 7.4  | <a href="http://www.electroniccigaretteadvice.org/">http://www.electroniccigaretteadvice.org/</a>                                                                                                                               | N/A – we were not<br>able to archive the<br>URL                                         |                                                                                                                  |  |

|                                                                     |        |                            |      |      |      |      |      |                                                                                                                                                                                               |                                                                                         |  |
|---------------------------------------------------------------------|--------|----------------------------|------|------|------|------|------|-----------------------------------------------------------------------------------------------------------------------------------------------------------------------------------------------|-----------------------------------------------------------------------------------------|--|
| FDA (US Food and Drug Administration) (Consumer Health Information) | USA    | US government entities     | 14.6 | 12.5 | 16.7 | 18.8 | 15.6 | <a href="http://www.fda.gov/downloads/ForConsumers/ConsumerUpdates/UCM173430.pdf">http://www.fda.gov/downloads/ForConsumers/ConsumerUpdates/UCM173430.pdf</a>                                 | <a href="http://www.webcitation.org/6f2B8Eo8Q">http://www.webcitation.org/6f2B8Eo8Q</a> |  |
| FDA (US Food and Drug Administration) (FAQ)                         | USA    | US government entities     | 13.4 | 11.7 | 15.4 | 15.0 | 13.9 | <a href="http://www.fda.gov/ForConsumers/ConsumerUpdates/ucm225210.htm">http://www.fda.gov/ForConsumers/ConsumerUpdates/ucm225210.htm</a>                                                     | <a href="http://www.webcitation.org/6f1eAJ7Tv">http://www.webcitation.org/6f1eAJ7Tv</a> |  |
| FDA (US Food and Drug Administration) (General Info)                | USA    | US government entities     | 16.1 | 13.3 | 17.5 | 18.5 | 16.4 | <a href="http://www.fda.gov/NewsEvents/PublicHealthFocus/ucm172906.htm">http://www.fda.gov/NewsEvents/PublicHealthFocus/ucm172906.htm</a>                                                     | <a href="http://www.webcitation.org/6f0hYhBfX">http://www.webcitation.org/6f0hYhBfX</a> |  |
| Health Canada                                                       | Canada | Non-US government entities | 15.8 | 12.0 | 16.0 | 18.3 | 15.5 | <a href="http://www.healthycanadians.gc.ca/recall-alert-rappel-avis/hc-sc/2009/13373a-eng.php">http://www.healthycanadians.gc.ca/recall-alert-rappel-avis/hc-sc/2009/13373a-eng.php</a>       | <a href="http://www.webcitation.org/6f2KM2PtP">http://www.webcitation.org/6f2KM2PtP</a> |  |
| HHS (US Health & Human Services Department)                         | USA    | US government entities     | 12.6 | 11.2 | 16.0 | 14.8 | 13.7 | <a href="http://betobaccofre.e.hhs.gov/about-tobacco/Electronic-Cigarettes/">http://betobaccofre.e.hhs.gov/about-tobacco/Electronic-Cigarettes/</a>                                           | <a href="http://www.webcitation.org/6f0i2xcor">http://www.webcitation.org/6f0i2xcor</a> |  |
| King County Public Health                                           | USA    | US government entities     | 13.6 | 11.4 | 17.0 | 15.3 | 14.3 | <a href="http://www.kingcounty.gov/healthservices/health/tobacco/tobacco-vapor/e-cigarettes.aspx">http://www.kingcounty.gov/healthservices/health/tobacco/tobacco-vapor/e-cigarettes.aspx</a> | <a href="http://www.webcitation.org/6f1kCOxp1">http://www.webcitation.org/6f1kCOxp1</a> |  |
| Maine Center for Disease                                            | USA    | US government              | 11.5 | 10.2 | 15.4 | 13.0 | 12.5 | <a href="http://www.maine.gov/deh/healthben">http://www.maine.gov/deh/healthben</a>                                                                                                           | <a href="http://www.webcitation.org/6f1gtdHZ">http://www.webcitation.org/6f1gtdHZ</a>   |  |

|                                                  |             |                             |      |      |      |      |      |                                                                                                                                                                                                                                                 |                                                                                         |                            |  |
|--------------------------------------------------|-------------|-----------------------------|------|------|------|------|------|-------------------------------------------------------------------------------------------------------------------------------------------------------------------------------------------------------------------------------------------------|-----------------------------------------------------------------------------------------|----------------------------|--|
| Control and Prevention                           |             | entities                    |      |      |      |      |      |                                                                                                                                                                                                                                                 | es/wellness/documents/13-25-0009E-CigFacts-HlthPro.pdf                                  | V                          |  |
| Mayo Clinic (FAQ)                                | USA         | Nongovernment organizations | 12.8 | 12.1 | 16.0 | 13.8 | 13.7 | <a href="http://www.mayoclinic.org/healthy-lifestyle/quit-smoking/expert-answers/electronic-cigarettes/faq-20057776">http://www.mayoclinic.org/healthy-lifestyle/quit-smoking/expert-answers/electronic-cigarettes/faq-20057776</a>             | <a href="http://www.webcitation.org/6f1r7Rj1v">http://www.webcitation.org/6f1r7Rj1v</a> |                            |  |
| Mayo Clinic (General Info)                       | USA         | Nongovernment organizations | 12.0 | 10.5 | 16.1 | 14.0 | 13.2 | <a href="http://newsnetwork.mayoclinic.org/discussion/mayo-clinic-experts-what-should-you-know-about-e-cigarettes-26c7a6/">http://newsnetwork.mayoclinic.org/discussion/mayo-clinic-experts-what-should-you-know-about-e-cigarettes-26c7a6/</a> | <a href="http://www.webcitation.org/6f1rGVd8i">http://www.webcitation.org/6f1rGVd8i</a> |                            |  |
| Michigan Department of Health and Human Services | USA         | US government entities      | 13.9 | 12.5 | 16.8 | 16.8 | 15.0 | <a href="https://www.michigan.gov/documents/mdch/E_Cigarette_Facts_465520_7.pdf">https://www.michigan.gov/documents/mdch/E_Cigarette_Facts_465520_7.pdf</a>                                                                                     | <a href="http://www.webcitation.org/6f1klrSQU">http://www.webcitation.org/6f1klrSQU</a> |                            |  |
| Ministry of Health New Zealand                   | New Zealand | Non-US government entities  | 12.9 | 11.8 | 15.6 | 14.5 | 13.7 | <a href="http://www.health.govt.nz/our-work/preventative-health-wellness/tobacco-control/advice-use-e-cigarettes">http://www.health.govt.nz/our-work/preventative-health-wellness/tobacco-control/advice-use-e-cigarettes</a>                   | <a href="http://www.webcitation.org/6f2DS6JMH">http://www.webcitation.org/6f2DS6JMH</a> |                            |  |
| Minnesota department of health                   | USA         | US government entities      | 12.7 | 11.3 | 16.6 | 14.1 | 13.7 | <a href="http://www.health.state.mn.us/ecigarettes">http://www.health.state.mn.us/ecigarettes</a>                                                                                                                                               | <a href="http://www.webcitation.org/6f1nyg1Je">http://www.webcitation.org/6f1nyg1Je</a> |                            |  |
| National Institute on Drug Abuse (NIDA)          | USA         | US government entities      | 12.6 | 10.3 | 14.4 | 13.4 | 12.7 | <a href="https://teens.drugabuse.gov/drug-facts/tobacco-">https://teens.drugabuse.gov/drug-facts/tobacco-</a>                                                                                                                                   | N/A - we were not able to archive the URL                                               | We examined "What About E- |  |

|                                                                                                    |     | (teen)                        |      |      |      |      |      |                                                                                                                                                               | nicotine-e-cigarettes                                                                   |  | Cigarettes?" section |
|----------------------------------------------------------------------------------------------------|-----|-------------------------------|------|------|------|------|------|---------------------------------------------------------------------------------------------------------------------------------------------------------------|-----------------------------------------------------------------------------------------|--|----------------------|
| NC Department of Health and Human Services - Tobacco Prevention and Control Branch                 | USA | US government entities        | 13.5 | 11.2 | 15.0 | 14.9 | 13.6 | <a href="http://www.tobacco-preventionandcontrol.ncdhhs.gov/ecigs/">http://www.tobacco-preventionandcontrol.ncdhhs.gov/ecigs/</a>                             | <a href="http://www.webcitation.org/6f1fVxw9">http://www.webcitation.org/6f1fVxw9</a>   |  |                      |
| Nebraska Department of Health & Human Services                                                     | USA | US government entities        | 11.6 | 10.6 | 13.7 | 12.9 | 12.2 | <a href="http://dhhs.ne.gov/publichealth/Pages/tfn_arr_tfncig.aspx">http://dhhs.ne.gov/publichealth/Pages/tfn_arr_tfncig.aspx</a>                             | <a href="http://www.webcitation.org/6f1gZHDRZ">http://www.webcitation.org/6f1gZHDRZ</a> |  |                      |
| NHS (National Health Service) UK                                                                   | UK  | Non-US government entities    | 12.6 | 11.0 | 13.3 | 12.6 | 12.4 | <a href="http://www.nhs.uk/smokefree/help-and-advice/e-cigarettes">http://www.nhs.uk/smokefree/help-and-advice/e-cigarettes</a>                               | <a href="http://www.webcitation.org/6f2KUVLpr">http://www.webcitation.org/6f2KUVLpr</a> |  |                      |
| NIDA (National Institute on Drug Abuse)                                                            | USA | US government entities (teen) | 7.3  | 8.5  | 10.5 | 8.5  | 8.7  | <a href="http://teens.drugabuse.gov/blog/post/are-e-cigarettes-harmful">http://teens.drugabuse.gov/blog/post/are-e-cigarettes-harmful</a>                     | <a href="http://www.webcitation.org/6f1jrPye3">http://www.webcitation.org/6f1jrPye3</a> |  |                      |
| NIH (National Institutes of Health): National Institute on Drug Abuse (E-cigarettes and E-hookahs) | USA | US government entities        | 8.6  | 8.0  | 12.1 | 9.8  | 9.6  | <a href="https://www.nlm.nih.gov/medlineplus/ency/patientinstructions/000761.htm">https://www.nlm.nih.gov/medlineplus/ency/patientinstructions/000761.htm</a> | <a href="http://www.webcitation.org/6f1jJ3gUn">http://www.webcitation.org/6f1jJ3gUn</a> |  |                      |

|                                                                                          |           |                            |      |      |      |      |      |                                                                                                                                                                                                                                                                                                                                            |                                                                                         |  |
|------------------------------------------------------------------------------------------|-----------|----------------------------|------|------|------|------|------|--------------------------------------------------------------------------------------------------------------------------------------------------------------------------------------------------------------------------------------------------------------------------------------------------------------------------------------------|-----------------------------------------------------------------------------------------|--|
| NIH<br>(National Institutes of Health):<br>National Institute on Drug Abuse<br>(FAQ)     | USA       | US government entities     | 15.3 | 12.2 | 16.3 | 16.7 | 15.1 | <a href="https://www.drugabuse.gov/publications/drugfacts/electronic-cigarettes-e-cigarettes">https://www.drugabuse.gov/publications/drugfacts/electronic-cigarettes-e-cigarettes</a><br><a href="http://www.drugabuse.gov/sites/default/files/drugfacts_e-cigs.pdf">http://www.drugabuse.gov/sites/default/files/drugfacts_e-cigs.pdf</a> | <a href="http://www.webcitation.org/6f1f3IW58">http://www.webcitation.org/6f1f3IW58</a> |  |
| NIH<br>(National Institutes of Health):<br>National Institute on Drug Abuse<br>(Summary) | USA       | US government entities     | 11.8 | 10.8 | 14.9 | 12.8 | 12.6 | <a href="https://www.nlm.nih.gov/medlineplus/ecigarettes.html">https://www.nlm.nih.gov/medlineplus/ecigarettes.html</a>                                                                                                                                                                                                                    | <a href="http://www.webcitation.org/6f1exn6e">http://www.webcitation.org/6f1exn6e</a>   |  |
| North Dakota Department of Health                                                        | USA       | US government entities     | 10.7 | 10.6 | 15.5 | 13.4 | 12.6 | <a href="https://www.ndhealth.gov/Tobacco/Facts/E-cigs.pdf">https://www.ndhealth.gov/Tobacco/Facts/E-cigs.pdf</a>                                                                                                                                                                                                                          | <a href="http://www.webcitation.org/6f1fKpl8u">http://www.webcitation.org/6f1fKpl8u</a> |  |
| NSW (New South Wales) Government Health                                                  | Australia | Non-US government entities | 12.9 | 12.5 | 14.2 | 14.9 | 13.6 | <a href="http://www.health.nsw.gov.au/tobacco/Pages/electronic-cigarettes.aspx">http://www.health.nsw.gov.au/tobacco/Pages/electronic-cigarettes.aspx</a>                                                                                                                                                                                  | <a href="http://www.webcitation.org/6f2DCv3sg">http://www.webcitation.org/6f2DCv3sg</a> |  |
| Oregon Public Health (General Info)                                                      | USA       | US government entities     | 17.0 | 13.3 | 16.9 | 19.2 | 16.6 | <a href="http://public.health.oregon.gov/PreventionWellness/TobaccoPrevention/SmokefreeWorkplaceLaw/Pages/e-cigarettes.aspx">http://public.health.oregon.gov/PreventionWellness/TobaccoPrevention/SmokefreeWorkplaceLaw/Pages/e-cigarettes.aspx</a>                                                                                        | <a href="http://www.webcitation.org/6f1fYhguF">http://www.webcitation.org/6f1fYhguF</a> |  |
| Oregon Public Health (News Letter)                                                       | USA       | US government entities     | 13.6 | 11.9 | 15.6 | 16.7 | 14.4 | <a href="http://public.health.oregon.gov/DiseasesConditions/CommunicableDisease/CDSummaryNewsletter/Documents/2013/ohd6227.pdf">http://public.health.oregon.gov/DiseasesConditions/CommunicableDisease/CDSummaryNewsletter/Documents/2013/ohd6227.pdf</a>                                                                                  | <a href="http://www.webcitation.org/6f1njfEDn">http://www.webcitation.org/6f1njfEDn</a> |  |

|                                                                                 |           |                             |      |      |      |      |      |                                                                                                                                                                                                                                           |                                                                                         |
|---------------------------------------------------------------------------------|-----------|-----------------------------|------|------|------|------|------|-------------------------------------------------------------------------------------------------------------------------------------------------------------------------------------------------------------------------------------------|-----------------------------------------------------------------------------------------|
| Public Health England                                                           | UK        | Non-US government entities  | 13.1 | 10.6 | 14.2 | 16.4 | 13.6 | <a href="https://www.gov.uk/government/news/e-cigarettes-around-95-less-harmful-than-tobacco-estimates-landmark-review">https://www.gov.uk/government/news/e-cigarettes-around-95-less-harmful-than-tobacco-estimates-landmark-review</a> | N/A – we were not able to archive the URL                                               |
| Public Health Law Center                                                        | USA       | Nongovernment organizations | 19.7 | 14.8 | 19.2 | 22.7 | 19.1 | <a href="http://publichealthlawcenter.org/topics/tobacco-control/e-cigarettes">http://publichealthlawcenter.org/topics/tobacco-control/e-cigarettes</a>                                                                                   | <a href="http://www.webcitation.org/6f1eieZ1i">http://www.webcitation.org/6f1eieZ1i</a> |
| SafeSmoke Australian Laws                                                       | Australia | For-profit entities         | 13.6 | 10.6 | 13.1 | 14.7 | 13.0 | <a href="http://safesmoke.com.au/australian-laws/">http://safesmoke.com.au/australian-laws/</a>                                                                                                                                           | <a href="http://www.webcitation.org/6f2Doz2gM">http://www.webcitation.org/6f2Doz2gM</a> |
| SAMHSA (Substance Abuse and Mental Health Services Administration)              | USA       | US government entities      | 12.7 | 11.3 | 15.0 | 14.1 | 13.3 | <a href="http://www.samhsa.gov/samhsaNewsletter/Volume_22_Number_3/e-cigarettes/">http://www.samhsa.gov/samhsaNewsletter/Volume_22_Number_3/e-cigarettes/</a>                                                                             | N/A – we were not able to archive the URL                                               |
| South tyneside council                                                          | UK        | Non-US government entities  | 18.0 | 13.3 | 14.5 | 21.2 | 16.7 | <a href="http://www.southtyneside.gov.uk/article/26329/electronic-cigarette-safety-information">http://www.southtyneside.gov.uk/article/26329/electronic-cigarette-safety-information</a>                                                 | <a href="http://www.webcitation.org/6f2CcQ7RD">http://www.webcitation.org/6f2CcQ7RD</a> |
| Tobacco Control Research Branch of the National Cancer Institute (General Info) | USA       | US government entities      | 9.6  | 8.2  | 11.6 | 10.3 | 9.9  | <a href="http://smokefree.gov/E-cigarettes">http://smokefree.gov/E-cigarettes</a>                                                                                                                                                         | <a href="http://www.webcitation.org/6f1eSZYup">http://www.webcitation.org/6f1eSZYup</a> |

|                                                                         |           |                               |      |      |      |      |      |                                                                                                                                                                                                                         |                                                                                         |                                                       |
|-------------------------------------------------------------------------|-----------|-------------------------------|------|------|------|------|------|-------------------------------------------------------------------------------------------------------------------------------------------------------------------------------------------------------------------------|-----------------------------------------------------------------------------------------|-------------------------------------------------------|
| Tobacco Control Research Branch of the National Cancer Institute (Teen) | USA       | US government entities (teen) | 10.2 | 9.6  | 12.5 | 10.6 | 10.7 | <a href="http://teen.smokefree.gov/e-cigs.aspx">http://teen.smokefree.gov/e-cigs.aspx</a>                                                                                                                               | <a href="http://www.webcitation.org/6f1fPbZmF">http://www.webcitation.org/6f1fPbZmF</a> |                                                       |
| U.S. Fire Administration                                                | USA       | US government entities        | 12.3 | 11.5 | 16.1 | 14.5 | 13.6 | <a href="https://www.usfa.fema.gov/downloads/pdf/publications/electronic_cigarettes.pdf">https://www.usfa.fema.gov/downloads/pdf/publications/electronic_cigarettes.pdf</a>                                             | <a href="http://www.webcitation.org/6f1f8Zz9R">http://www.webcitation.org/6f1f8Zz9R</a> | We examined "Health Safety" section                   |
| Utah Davis County Health Department                                     | USA       | US government entities        | 11.9 | 10.8 | 14.2 | 12.4 | 12.3 | <a href="https://www.daviscountyutah.gov/health/environmental-health-services/permits/businesses/e-cigarettes">https://www.daviscountyutah.gov/health/environmental-health-services/permits/businesses/e-cigarettes</a> | <a href="http://www.webcitation.org/6f2BOqqYU">http://www.webcitation.org/6f2BOqqYU</a> |                                                       |
| Utah Department of Health                                               | USA       | US government entities        | 12.4 | 11.1 | 16.0 | 14.5 | 13.5 | <a href="http://health.utah.gov/tobacco/pdfs/E-Cigarette1.pdf">http://health.utah.gov/tobacco/pdfs/E-Cigarette1.pdf</a>                                                                                                 | <a href="http://www.webcitation.org/6f2C6TDLw">http://www.webcitation.org/6f2C6TDLw</a> |                                                       |
| Vapegrl                                                                 | N/A       | For-profit entities           | 12.3 | 11.3 | 12.8 | 13.1 | 12.4 | <a href="http://vapegrl.com/e-cigarette-tips-and-tricks/">http://vapegrl.com/e-cigarette-tips-and-tricks/</a>                                                                                                           | <a href="http://www.webcitation.org/6f2Job1HC">http://www.webcitation.org/6f2Job1HC</a> | Material consists of advice on using e-cigarette only |
| Veppo                                                                   | Australia | For-profit entities           | 10.6 | 9.3  | 12.9 | 11.2 | 11.0 | <a href="http://www.veppocig.com/electronic-cigarettes-with-nicotine-for-australia/">http://www.veppocig.com/electronic-cigarettes-with-nicotine-for-australia/</a>                                                     | N/A - we were not able to archive the URL                                               |                                                       |
| Vermont Department of Health                                            | USA       | US government entities        | 14.6 | 12.4 | 18.7 | 17.8 | 15.9 | <a href="http://healthvermont.gov/prevent/tobacco/documents/ECigarette_factsheet.p">http://healthvermont.gov/prevent/tobacco/documents/ECigarette_factsheet.p</a>                                                       | <a href="http://www.webcitation.org/6f1ms6xAf">http://www.webcitation.org/6f1ms6xAf</a> |                                                       |



|                                       |                |                              |      |      |      |      |      |                                                                                                                                                                                                                                                                                                                                                                 |                                                                                         |                                                       |  |
|---------------------------------------|----------------|------------------------------|------|------|------|------|------|-----------------------------------------------------------------------------------------------------------------------------------------------------------------------------------------------------------------------------------------------------------------------------------------------------------------------------------------------------------------|-----------------------------------------------------------------------------------------|-------------------------------------------------------|--|
|                                       |                |                              |      |      |      |      |      |                                                                                                                                                                                                                                                                                                                                                                 | df                                                                                      |                                                       |  |
| Washington State Department of Health | USA            | US government entities       | 10.3 | 9.9  | 14.0 | 11.9 | 11.5 | <a href="http://www.doh.wa.gov/YouandYourFamily/Tobacco/OtherTobaccoProducts/E-cigarettes">http://www.doh.wa.gov/YouandYourFamily/Tobacco/OtherTobaccoProducts/E-cigarettes</a>                                                                                                                                                                                 | <a href="http://www.webcitation.org/6f1hIUZSM">http://www.webcitation.org/6f1hIUZSM</a> |                                                       |  |
| WebMD                                 | USA            | For-profit entities          | 7.9  | 8.1  | 12.4 | 9.3  | 9.4  | <a href="http://www.webmd.com/smoking-cessation/features/electronic-cigarettes">http://www.webmd.com/smoking-cessation/features/electronic-cigarettes</a>                                                                                                                                                                                                       | <a href="http://www.webcitation.org/6f1rbWmFX">http://www.webcitation.org/6f1rbWmFX</a> |                                                       |  |
| White Smoke Review                    | N/A            | For-profit entities          | 8.0  | 8.3  | 9.8  | 8.6  | 8.7  | <a href="http://whitesmokerreview.com/e-cigarette-tips/">http://whitesmokerreview.com/e-cigarette-tips/</a>                                                                                                                                                                                                                                                     | <a href="http://www.webcitation.org/6f2JCQqXY">http://www.webcitation.org/6f2JCQqXY</a> | Material consists of advice on using e-cigarette only |  |
| WHO (World Health Organization)       | United Nations | Non-Government Organizations | 12.7 | 10.7 | 14.0 | 14.5 | 13.0 | <a href="http://www.who.int/bulletin/volumes/92/12/14-031214/en/">http://www.who.int/bulletin/volumes/92/12/14-031214/en/</a><br><a href="http://www.who.int/bulletin/volumes/92/12/14-031214.pdf">http://www.who.int/bulletin/volumes/92/12/14-031214.pdf</a><br><a href="http://dx.doi.org/10.2471/BLT.14.031214">http://dx.doi.org/10.2471/BLT.14.031214</a> | <a href="http://www.webcitation.org/6f1ec5d0u">http://www.webcitation.org/6f1ec5d0u</a> |                                                       |  |
| Wikimedia Foundation                  | USA            | Non-Government Organizations | 14.2 | 12.2 | 16.7 | 17.1 | 15.1 | <a href="https://en.wikipedia.org/wiki/Electronic_cigarette">https://en.wikipedia.org/wiki/Electronic_cigarette</a>                                                                                                                                                                                                                                             | <a href="http://www.webcitation.org/6f1pGP9NL">http://www.webcitation.org/6f1pGP9NL</a> | We examined "Health Effects" section                  |  |
