# Supplementary material for: The Readability of Electronic Cigarette Health Information and Advice: A Quantitative Analysis of Web-Based Information
Source: PubMed Central journal article supplement (PMC5251168; doi:10.2196/publichealth.6687), 2017-01-06
Supplement: publichealth_v3i1e1_app2.pdf [file publichealth_v3i1e1_app2.pdf]

**Multimedia Appendix 2 - Mean (SE) of each organization type**

| <b>Organization Type</b>                 | <b>Freq.</b> | <b>Mean (St. Err.) of Flesch Kincaid Grade</b> | <b>Mean (St. Err.) of Smog Index</b> | <b>Mean (St. Err.) of Coleman Liau Index</b> | <b>Mean (St. Err.) of Automated Readability Index</b> | <b>Mean (St. Err.) of 4 metrics</b> |
|------------------------------------------|--------------|------------------------------------------------|--------------------------------------|----------------------------------------------|-------------------------------------------------------|-------------------------------------|
| For-profit entities                      | 10           | 10.14 (0.64)                                   | 9.37 (0.38)                          | 11.52 (0.64)                                 | 10.83 (0.68)                                          | 10.46 (0.55)                        |
| Nongovernment organizations              | 7            | 13.64 (1.06)                                   | 11.66 (0.61)                         | 16.00 (0.67)                                 | 15.90 (1.21)                                          | 14.30 (0.86)                        |
| Non-US government entities               | 7            | 14.36 (0.77)                                   | 12.07 (0.40)                         | 14.93 (0.46)                                 | 16.41 (1.06)                                          | 14.44 (0.58)                        |
| US government                            | 27           | 12.66 (0.37)                                   | 11.17 (0.24)                         | 15.51 (0.29)                                 | 14.57 (0.46)                                          | 13.48 (0.33)                        |
| US government entities written for teens | 3            | 10.03 (1.53)                                   | 9.47 (0.52)                          | 12.50 (1.13)                                 | 10.83 (1.42)                                          | 10.71 (1.15)                        |
