# Supplementary material for: The Readability of Electronic Cigarette Health Information and Advice: A Quantitative Analysis of Web-Based Information
Source: PubMed Central journal article supplement (PMC5251168; doi:10.2196/publichealth.6687), 2017-01-06
Supplement: publichealth_v3i1e1_app3.pdf [file publichealth_v3i1e1_app3.pdf]

**Multimedia Appendix 3 - Pairwise *t* test of Flesch Kincaid Grade**

| Organization Type                  | Organization Type           | <i>t</i> value | <i>P</i> value | Adjusted p-value (Hommel) |
|------------------------------------|-----------------------------|----------------|----------------|---------------------------|
| Versus for-profit entities         | Nongovernment organizations | -3.01          | .009           | .07                       |
|                                    | Non-US government entities  | -4.23          | .001           | .007                      |
|                                    | US government               | -3.49          | .001           | .01                       |
|                                    | US government (teen)        | 0.08           | .94            | .94                       |
| Versus nongovernment organizations | Non-US government entities  | -0.55          | .60            | .94                       |
|                                    | US government               | 1.09           | .28            | .85                       |
|                                    | US government (teen)        | 1.89           | .10            | .38                       |
| Versus non-US government entities  | US government               | 2.04           | .05            | .24                       |
|                                    | US government (teen)        | 2.84           | .02            | .13                       |
| Versus US government               | US government (teen)        | 2.16           | .04            | .20                       |
