# Supplementary material for: The Readability of Electronic Cigarette Health Information and Advice: A Quantitative Analysis of Web-Based Information
Source: PubMed Central journal article supplement (PMC5251168; doi:10.2196/publichealth.6687), 2017-01-06
Supplement: publichealth_v3i1e1_app4.pdf [file publichealth_v3i1e1_app4.pdf]

**Multimedia Appendix 4 - Pairwise t test of SMOG Index**

| Organization Type                  | Organization Type           | t value | P value | Adjusted p-value (Hommel) |
|------------------------------------|-----------------------------|---------|---------|---------------------------|
| Versus for-profit entities         | Nongovernment organizations | -3.35   | .004    | .03                       |
|                                    | Non-US government entities  | -4.78   | <.001   | .002                      |
|                                    | US government               | -3.90   | <.001   | .004                      |
|                                    | US government (teen)        | -0.13   | .90     | .90                       |
| Versus nongovernment organizations | Non-US government entities  | -0.57   | .58     | .90                       |
|                                    | US government               | 0.86    | .40     | .87                       |
|                                    | US government (teen)        | 2.15    | .06     | .26                       |
| Versus non-US government entities  | US government               | 1.74    | .09     | .37                       |
|                                    | US government (teen)        | 3.72    | .006    | .04                       |
| Versus US government               | US government (teen)        | 2.26    | .03     | .18                       |
