# Supplementary material for: The Readability of Electronic Cigarette Health Information and Advice: A Quantitative Analysis of Web-Based Information
Source: PubMed Central journal article supplement (PMC5251168; doi:10.2196/publichealth.6687), 2017-01-06
Supplement: publichealth_v3i1e1_app5.pdf [file publichealth_v3i1e1_app5.pdf]

**Multimedia Appendix 5 - Pairwise t test of Coleman Liau Index**

| Organization Type                  | Organization Type           | t value | P value | Adjusted p-value (Hommel) |
|------------------------------------|-----------------------------|---------|---------|---------------------------|
| Versus for-profit entities         | Nongovernment organizations | -4.71   | <.001   | .003                      |
|                                    | Non-US government entities  | -3.94   | .001    | .01                       |
|                                    | US government               | -6.45   | <.001   | <.001                     |
|                                    | US government (teen)        | -0.74   | .48     | .48                       |
| Versus nongovernment organizations | Non-US government entities  | 1.32    | .21     | .48                       |
|                                    | US government               | 0.74    | .47     | .48                       |
|                                    | US government (teen)        | 2.80    | .02     | .12                       |
| Versus non-US government entities  | US government               | -0.93   | .36     | .48                       |
|                                    | US government (teen)        | 2.45    | .04     | .20                       |
| Versus US government               | US government (teen)        | 3.17    | .004    | .03                       |
