# Supplementary material for: The Readability of Electronic Cigarette Health Information and Advice: A Quantitative Analysis of Web-Based Information
Source: PubMed Central journal article supplement (PMC5251168; doi:10.2196/publichealth.6687), 2017-01-06
Supplement: publichealth_v3i1e1_app6.pdf [file publichealth_v3i1e1_app6.pdf]

**Multimedia Appendix 6 - Pairwise t test of Automated Readability Index**

| Organization Type                  | Organization Type           | t value | P value | Adjusted p-value (Hommel) |
|------------------------------------|-----------------------------|---------|---------|---------------------------|
| Versus for-profit entities         | Nongovernment organizations | -3.94   | .001    | .01                       |
|                                    | Non-US government entities  | -4.66   | <.001   | .003                      |
|                                    | US government               | -4.34   | <.001   | .001                      |
|                                    | US government (teen)        | -0.002  | 1.00    | 1.00                      |
| Versus nongovernment organizations | Non-US government entities  | -0.32   | .75     | 1.00                      |
|                                    | US government               | 1.23    | .23     | .69                       |
|                                    | US government (teen)        | 2.43    | .04     | .21                       |
| Versus non-US government entities  | US government               | 1.76    | .09     | .35                       |
|                                    | US government (teen)        | 2.97    | .02     | .11                       |
| Versus US government               | US government (teen)        | 2.56    | .02     | .10                       |
